# Supplementary material
Source: publisher figshare collection journal article supplement (https://acs.figshare.com/ndownloader/files/14288240)
Supplement: Supplementary file 1 [file 14288240]

# Effect of Equation of States on High Pressure Volumetric Measurements of Methane-Coal Sorption Isotherms - Part 1: Volumes of Free Space and Methane Adsorption Isotherms

Jamiu M. Ekundayo\* and Reza Rezaee

\* Corresponding Author's E-mail Address: [Jamiu.Ekundayo@student.curtin.edu.au](mailto:Jamiu.Ekundayo@student.curtin.edu.au)

This supporting information for our manuscript titled “*Effect of Equation of States on High Pressure Volumetric Measurements of Methane-Coal Sorption Isotherms - Part 1: Volumes of Free Space and Methane Adsorption Isotherms*” contains the appendices mentioned in the manuscript. It contains (a) appendix A – description of the comparison equations of state (b) appendix B - description of the adsorption steps and (c) appendix C – volume of free space calculated by different equations of state

## Appendix A – Description of the Comparison Equations of State

### A1. Cubic Equations of State

In terms of molar volume, Van der Waal type cubic equations of state assume the following general mathematical form:

$$P = \frac{RT}{(v_m + \beta)} - \frac{a(T)}{(v_m + \delta)(v_m + \gamma)} \quad A1$$

Where the parameters  $P$ ,  $R$  and  $T$  are the pressure, gas constant and temperature respectively;  $\delta$  and  $\gamma$  are EOS-specific parameters while parameters  $a(T)$  and  $\beta$  are similarly defined for all Van der Waal type equations of state as:

$$a(T) = a = \frac{\Omega_a \alpha(T) R^2 T_c^2}{P_c} \quad A2$$

$$\beta = -b \quad A3$$

The parameter  $b$  is given as:

$$b = \frac{\Omega_b R T_c}{P_c} \quad A4$$

Where  $\Omega_a$ ,  $\Omega_b$  EOS-specific constants and  $T_c$ ,  $P_c$  are the critical temperature and critical pressure of the gas respectively. The temperature dependent parameter  $\alpha(T)$  is also EOS-specific and is given as:

$$\alpha(T) = \left(1 + m \left(1 - T_r^{\frac{1}{2}}\right)\right)^2 \quad A5$$

Where:

$T_r = \frac{T}{T_c}$  is the reduce temperature and  $m$  is EOS-specific.

In terms of the molar volume, the *equation A1* can be expanded to yield

$$v_m^3 + v_m^2 \left( \beta + \delta + \gamma - \frac{RT}{P} \right) + v_m \left( \beta\delta + \beta\gamma + \delta\gamma - \frac{RT}{P}\delta - \frac{RT}{P}\gamma + \frac{a}{P} \right) + \left( \frac{a}{P}\beta - \frac{RT}{P}\delta\gamma + \beta\delta\gamma \right) = 0 \quad A6$$

The molar volume of the gas can be obtained as the lowest root of *equation A6* for a given EOS.

Alternatively, *equation A6* can be expressed in terms of the gas compressibility factor,  $Z$  as:

$$Z^3 + Z^2 \left( \frac{P}{RT}(\beta + \delta + \gamma) - 1 \right) + Z \left( \frac{P^2}{R^2T^2}(\beta\delta + \beta\gamma + \delta\gamma) - \frac{P}{RT}\delta - \frac{P}{RT}\gamma + \frac{P}{R^2T^2}a \right) + \left( \frac{P^2}{R^3T^3}a\beta - \frac{P^2}{R^2T^2}\delta\gamma + \frac{P^3}{R^3T^3}\beta\delta\gamma \right) = 0 \quad A7$$

The largest root of *equation A7*, solved iteratively, is the  $z$ -factor of the gas for the given EOS parameters  $a, \beta, \delta$  and  $\gamma$ .

Also, for use in subsequent subsections, two additional parameters  $A$  &  $B$  are generally defined as

$$A = \frac{aP}{R^2T^2} \quad A8$$

$$B = \frac{bP}{RT} \quad A9$$

### A1.1 Soave-Redlich-Kwong (SRK) Equation of State

The SRK-EOS is given as:

$$P = \frac{RT}{(v_m - b)} - \frac{a(T)}{v_m(v_m + b)} \quad A10$$

Compared to *equation A1*, it can be seen that  $\beta = -b$ ;  $\delta = 0$  and  $\gamma = b$ . The SRK-EOS is also characterized by  $\Omega_a = 0.42747$ ;  $\Omega_b = 0.08664$  and the parameter  $m$  is given as:

$$m = 0.480 + 1.574\omega - 0.176\omega^2 \quad A11$$

$\omega$  is the acentric factor of the fluid/gas being studied.

Substituting for the parameters  $\beta$ ,  $\delta$  and  $\gamma$  in *equation A7* and simplifying with *equations A8 & A9*, the SRK-EOS can be written in terms of gas compressibility as:

$$Z^3 - Z^2 + Z(A - B - B^2) - AB = 0 \quad A12$$

### A1.2 Peng-Robinson (PR) Equation of State

The PR-EOS is given as:

$$P = \frac{RT}{(v_m - b)} - \frac{a(T)}{(v_m^2 + 2bv_m - b^2)} = \frac{RT}{(v_m - b)} - \frac{a(T)}{[(v_m + (1 - \sqrt{2})b)][(v_m + (1 + \sqrt{2})b)]} \quad A13$$

Compared to *equation A1*, it can be seen that  $\beta = -b$ ;  $\delta = (1 - \sqrt{2})b$  and  $\gamma = (1 + \sqrt{2})b$ . The PR-EOS is also characterized by  $\Omega_a = 0.457535$ ;  $\Omega_b = 0.077796$  and  $m$  is given as:

$$m = 0.37464 + 1.54226\omega - 0.26992\omega^2 \quad A14$$

Substituting for the parameters  $\beta$ ,  $\delta$  and  $\gamma$  in *equation A7* and simplifying with *equations A8 & A9*, the PR-EOS can be written in terms of gas compressibility as:

$$Z^3 + (B - 1)Z^2 + Z(A - 2B - 3B^2) + (B^3 + B^2 - AB) = 0 \quad A15$$

### A1.3 SRK-Peneloux Equation of State

The SRK-Peneloux EOS is given as:

$$P = \frac{RT}{(v_m - b)} - \frac{a(T)}{(v_m + c)(v_m + b + 2c)} \quad A16$$

Compared to *equation A1*, it can be seen that  $\beta = -b$ ;  $\delta = c$  and  $\gamma = b + 2c$ . Parameter  $c$  is the volume shift factor introduced by Peneloux et al, to modify the SRK-EOS and given as:

$$c = 0.40768 \frac{RT_c}{P_c} (0.29441 - Z_{RA}) \quad A17$$

Where  $Z_{RA}$  is known as the Rackett compressibility factor [1] given as:

$$Z_{RA} = 0.29056 - 0.08775\omega \quad A18$$

Introducing a parameter C defined as:

$$C = \frac{cP}{RT} \quad A19$$

Substituting for the parameters  $\beta$ ,  $\delta$  and  $\gamma$  in *equation A7* and simplifying with the definitions of A, B & C, the SRK-Peneloux EOS can be written in terms of gas compressibility as:

$$Z^3 + (3C - 1)Z^2 + [A - B - B^2 - 2BC - 3C + 2C^2]Z - (AB + BC + B^2C + 2BC^2 + 2C^2) = 0 \quad A20$$

#### A1.4 PR-Peneloux Equation of State

The PR-Peneloux EOS is given as:

$$P = \frac{RT}{(v_m - b)} - \frac{a(T)}{\{v_m + [b(1 - \sqrt{2}) + c(2 - \sqrt{2})]\}\{v_m + [b(1 + \sqrt{2}) + c(2 + \sqrt{2})]\}} \quad A21$$

Comparing *equation A21* to *equation A1*, it can be seen that  $\beta = -b$ ;  $\delta = b(1 - \sqrt{2}) + c(2 - \sqrt{2})$  and  $\gamma = b(1 + \sqrt{2}) + c(2 + \sqrt{2})$ . The volume shift factor, c is defined in *equation A17* above. With these and the definition of C given in *equation A19*, the PR-Peneloux EOS can be written in terms of Z-factor as:

$$Z^3 + (B + 4C - 1)Z^2 + [A - 2B - 3B^2 - 4BC - 2C + 2C^2]Z - (AB - B^2 - B^3 + 2BC^2 + 2C^2) = 0 \quad A22$$

#### A2. Non-Cubic Equations of State

Two virial-type equations of state have been selected for comparison with the cubic equations presented in [section A1](#).

##### A2.1 LK-EOS

Lee and Kesler [2] presented a modification of Benedict-Webb-Rubin (BWR) EOS following the principle of corresponding states [2, 3]. In terms of the reduced parameters ( $P_r$ ,  $T_r$  &  $v_r$ ), the LK-EOS is given as:

$$1 + \frac{B}{v_r} + \frac{C}{v_r^2} + \frac{D}{v_r^5} + \frac{c_4}{T_r v_r^2} \left( \beta + \frac{\gamma}{v_r^2} \right) \exp\left(-\frac{\gamma}{v_r^2}\right) - \frac{P_r v_r}{T_r} = 0 \quad A23$$

The values of the variables B, C & D are given by the following auxiliary equations:

$$B = b_1 - \frac{b_2}{T_r} - \frac{b_3}{T_r^2} - \frac{b_4}{T_r^3}; \quad C = c_1 - \frac{c_2}{T_r} + \frac{c_3}{T_r^3}; \quad D = d_1 + \frac{d_2}{T_r}$$

The compressibility,  $Z$  of any fluid of known acentric factor ( $\omega$ ) is given in terms of the compressibility  $Z^0$  of a simple fluid ( $\omega = 0$ ) and the compressibility  $Z^{ref}$  of a reference fluid ( $\omega = \omega^{ref}$ ) as follows:

$$Z = Z^0 + \frac{\omega}{\omega^r} (Z^{ref} - Z^0) \quad A24$$

Where:

$$Z^0 = \frac{P_r v_r^0}{T_r} \quad A25a$$

$$Z^{ref} = \frac{P_r v_r^{ref}}{T_r} \quad A25b$$

$v_r^0$  &  $v_r^{ref}$  are respective the reduced specific molar volumes of the simple fluid (rare gas) and reference fluid (n-octane) determined by solving the *equation A23* for  $v_r$  using the corresponding values of the coefficients  $b_1, b_2, b_3, b_4, c_1, c_2, c_3, c_4, d_1, d_2, \beta$  and  $\gamma$  from *table A1* below.

**Table A1: Numerical Values of the coefficients of the LK-EOS [2]**

| Coefficient | Simple fluid             | Reference fluid          |
|-------------|--------------------------|--------------------------|
| $b_1$       | 0.1181193                | 0.2026579                |
| $b_2$       | 0.265728                 | 0.331511                 |
| $b_3$       | 0.15479                  | 0.027655                 |
| $b_4$       | 0.030323                 | 0.203488                 |
| $c_1$       | 0.0236744                | 0.0313385                |
| $c_2$       | 0.0186984                | 0.0503618                |
| $c_3$       | 0                        | 0.016901                 |
| $c_4$       | 0.042724                 | 0.041577                 |
| $d_1$       | $1.55488 \times 10^{-5}$ | $4.87360 \times 10^{-5}$ |
| $d_2$       | $6.23689 \times 10^{-5}$ | $74.0336 \times 10^{-5}$ |
| $\beta$     | 0.65392                  | 1.226                    |
| $\gamma$    | 0.060167                 | 0.03754                  |

## A2.2 SBWR-EOS

Soave [4]'s modification represented an attempt to reduce the number of terms while improving the accuracy of the BWR-EOS. The SBWR-EOS is given in terms of the 3 parameters ( $P_r, T_r$  &  $v_r$ ) as:

$$1 + \frac{B}{v_r} + \frac{D}{v_r^4} + \frac{E}{v_r^2} \left( 1 + \frac{F}{v_r^2} \right) \exp \left( -\frac{F}{v_r^2} \right) - \frac{P_r v_r}{T_r} = 0 \quad A26$$

The variables B, D, E and F are defined as given in the following auxiliary equations:

$$B = \frac{RT_c}{P_c} \left[ bZ_c + 0.422 \left( 1 - \frac{1}{T_r^{1.6}} \right) + 0.234\omega \left( 1 - \frac{1}{T_r^3} \right) \right] \quad A27a$$

$$D = d \left( \frac{RT_c Z_c}{P_c} \right)^4 \left[ 1 + d_1 \left( \frac{1}{T_r} - 1 \right) + d_2 \left( \frac{1}{T_r} - 1 \right)^2 \right] \quad A27b$$

$$E = \left( \frac{RT_c}{P_c} \right)^2 \left[ eZ_c^2 + e_1 \left( \frac{1}{T_r} - 1 \right) + e_2 \left( \frac{1}{T_r} - 1 \right)^2 + e_3 \left( \frac{1}{T_r} - 1 \right)^3 \right] \quad A27c$$

$$F = f \left( \frac{RT_c Z_c}{P_c} \right)^2 \quad A27d$$

$P_c$ ,  $T_c$  and  $Z_c$  are respectively the critical pressure, critical temperature and critical z-factor of a given fluid whose acentric factor is  $\omega$ . The critical z-factor can be calculated from the Rackett equation [4] given as:

$$Z_c = 0.2908 - 0.099\omega + 0.04\omega^2 \quad A28a$$

The coefficients in *equations 2.27a-d* can be obtained as follows:

$$b = Z_c - 1 - d - e(1 + f) \exp(-f) \quad A28b$$

$$d = \frac{1 - 2Z_c - e(1 + f - 2f^2) \exp(-f)}{3} \quad A28c$$

$$e = \frac{2 - 5Z_c}{(1 + f + 3f^2 - 2f^3) \exp(-f)} \quad A28d$$

$$f = 0.77 \quad A28e$$

$$d_1 = 0.4912 + 0.6478\omega \quad A28f$$

$$d_2 = 0.3000 + 0.3619\omega \quad A28g$$

$$e_1 = 0.0841 + 0.1318\omega + 0.0018\omega^2 \quad A28h$$

$$e_2 = 0.0750 + 0.2408\omega - 0.0140\omega^2 \quad A28i$$

$$e_3 = -0.0065 + 0.1798\omega - 0.0078\omega^2 \quad A28j$$

The compressibility of any fluid of known acentric factor can then be calculated from *equation A29* below once the reduced specific molar volume is obtained from *equation A26* above.

$$Z = \frac{P_r v_r}{T_r} \quad A29$$

## Appendix B – Description of the Adsorption Steps

### B1. Adsorption Steps

Consider two consecutive adsorption steps  $i - 1$  &  $i$  as illustrated in *figure B1* below. Each adsorption step involves 3 processes discussed as follows:

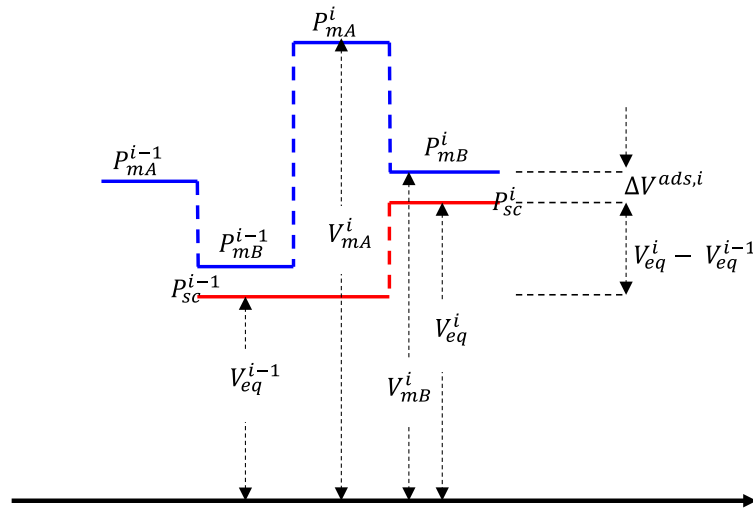

Figure B1: Schematic of 2 consecutive adsorption pressure steps

- Filling the manifold with the adsorbate:* The amount of gas that enters into the manifold at pressure,  $P_{mA}^i$  and temperature,  $T_{mA}^i$  (where  $i = 1, 2, 3, \dots, n$ ) is given as:

$$N_{mA}^i = \frac{P_{mA}^i}{T_{mA}^i Z_{mA}^i} \times \frac{V_{man}}{R} \quad B1$$

The equivalent volume at STP is given as:

$$V_{mA}^i \approx \frac{P_{mA}^i V_{man}}{T_{mA}^i Z_{mA}^i} \times \frac{V_{STP}}{R} \quad B2$$

Where  $V_{man}$  is the volume of the manifold,  $R$  = gas constant,  $Z$  is the gas compressibility factor and  $V_{STP}$  is the molar gas volume at STP ( $\approx 22400$  cc).

- b. *Expanding gas from the manifold to the sample cell:* The final pressure and temperature in the manifold are  $P_{mB}^i$  and  $T_{mB}^i$  respectively. Hence, the amount of gas expanded/dosed into the sample cell and the equivalent volume at STP can be calculated as:

$$N_{dosed}^{ads,i} = \Delta \left( \frac{P}{ZT} \right)_{man}^i \times \frac{V_{man}}{R} \quad B3$$

$$V_{dosed}^i \approx \left( \frac{P_{mA}^i V_{man}}{T_{mA}^i Z_{mA}^i} - \frac{P_{mB}^i V_{man}}{T_{mB}^i Z_{mB}^i} \right) \times \frac{V_{STP}}{R} \quad B4$$

- c. *Equilibrating the gas in the system:* The volume, at STP, of gas in equilibrium is given as:

$$V_{free}^i = (V_{eq}^i - V_{eq}^{i-1}) \quad B5$$

The free space available to gas is composed of three parts, the lower stem of volume,  $V_{ls}$ , the upper stem of volume,  $V_{us} = 7$ cc [5] and the sample cell of volume,  $V_{sc}$ . Therefore:

$$V_{free}^i = \frac{V_{STP}}{R} \left[ \left( \frac{P_{sc}^i V_{sc}}{T_{sc}^i Z_{sc}^i} + \frac{P_{us}^i V_{us}}{T_{us}^i Z_{us}^i} + \frac{P_{ls}^i V_{ls}}{T_{ls}^i Z_{ls}^i} \right) - \left( \frac{P_{sc}^{i-1} V_{sc}}{T_{sc}^{i-1} Z_{sc}^{i-1}} + \frac{P_{us}^{i-1} V_{us}}{T_{us}^{i-1} Z_{us}^{i-1}} + \frac{P_{ls}^{i-1} V_{ls}}{T_{ls}^{i-1} Z_{ls}^{i-1}} \right) \right] \quad B6$$

Writing a volume balance for the system,

$$V_{dosed}^i = V_{free}^i + \Delta V^i \quad B7$$

Putting *equations B4 and B6 in B7*, the differential adsorbed volume per unit mass of the adsorbent can be obtained as follows:



$$\begin{aligned}
\Delta \tilde{V}^i &= \frac{V_{STP}}{RM_s} \\
&\left[ \left( \frac{P_{mA}^i V_{man}}{T_{mA}^i Z_{mA}^i} - \frac{P_{mB}^i V_{man}}{T_{mB}^i Z_{mB}^i} \right) - \left( \frac{P_{sc}^i V_{sc}}{T_{sc}^i Z_{sc}^i} + \frac{P_{us}^i V_{us}}{T_{us}^i Z_{us}^i} + \frac{P_{ls}^i V_{ls}}{T_{ls}^i Z_{ls}^i} \right) + \left( \frac{P_{sc}^{i-1} V_{sc}}{T_{sc}^{i-1} Z_{sc}^{i-1}} + \frac{P_{us}^{i-1} V_{us}}{T_{us}^{i-1} Z_{us}^{i-1}} + \frac{P_{ls}^{i-1} V_{ls}}{T_{ls}^{i-1} Z_{ls}^{i-1}} \right) \right]
\end{aligned}$$

B8

The cumulative volume adsorbed per unit mass at any pressure step is given as:

$$\tilde{V}_r^{ads} = \sum_{i=1}^r (\Delta \tilde{V}^i) \quad B9$$

For the first adsorption step, it can be safely assumed that  $P_{sc}^0 = 0$  since the system is expected to be in fully evacuated prior to this step.

## B2. Ambient Free space Volume Calculation

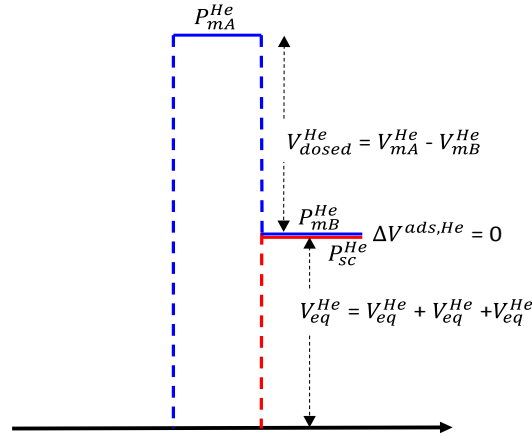

Figure B2: Schematic of helium expansion step measurement of free-space volume

As shown in *figure B2*, free space measurement follows the adsorption processes described in [section B1](#) above except that helium gas is used in this case. It is arguably assumed that helium adsorption is negligible ( $\Delta V^{ads, He} \approx 0$ ) [5, 6]. Therefore:

$$V_{dosed}^{He} = V_{eq}^{He} \quad B10$$

$$\frac{P_{mA}^{He} V_{man}}{T_{mA}^{He} Z_{mA}^{He}} - \frac{P_{mB}^{He} V_{man}}{T_{mB}^{He} Z_{mB}^{He}} = \frac{P_{sc}^{He} V_{sc}}{T_{sc}^{He} Z_{sc}^{He}} + \frac{P_{us}^{He} V_{us}}{T_{us}^{He} Z_{us}^{He}} + \frac{P_{ls}^{He} V_{ls}}{T_{ls}^{He} Z_{ls}^{He}} \quad B11$$

The HPVA-II 200® uses 2 temperature-point steps to determine the volume of free-space and the corresponding values  $V_{ls}$ , the volume of the lower stem of the sample holder and  $V_{sc}$ , the volume of the sample cell. Note that the volume of the upper stem  $V_{ls} \approx 7cc$  [5]. For the first step, it is assumed that  $T_{sc}^{He} = T_{ls}^{He} = \text{Ambient temperature}$ . In this case *equation 3.3* can be written as [6]:

$$V_{Amfs} = V_{sc} + V_{ls} + V_{us} = V_{lsc} + V_{us} \quad B12a$$

Which means:

$$V_{lsc} = V_{sc} + V_{ls} = V_{Amfs} - V_{us} \quad B12b$$

*Equation A11* can now be written as:

$$V_{Amfs} = \frac{T_{sc}^{He} Z_{sc}^{He}}{P_{sc}^{He}} \left( \frac{P_{mA}^{He} V_{man}}{T_{mA}^{He} Z_{mA}^{He}} - \frac{P_{mB}^{He} V_{man}}{T_{mB}^{He} Z_{mB}^{He}} - \frac{P_{sc}^{He} V_{us}}{T_{us}^{He} Z_{us}^{He}} + \frac{P_{sc}^{He} V_{us}}{T_{sc}^{He} Z_{sc}^{He}} \right) \quad B13$$

The second step proceeds at the experimental temperature such that  $T_{sc}^{He} \neq T_{ls}^{He}$ . In this case, *equations B11* & *B12a* are solved for the values of  $V_{sc}$  and  $V_{ls}$  using the value of  $V_{Amfs}$  determined from the previous step [6].

## Appendix C – Volume of Free Space for the Different EOS tested

### C1. Ambient Volumes of Free Space Calculated by Different EOS

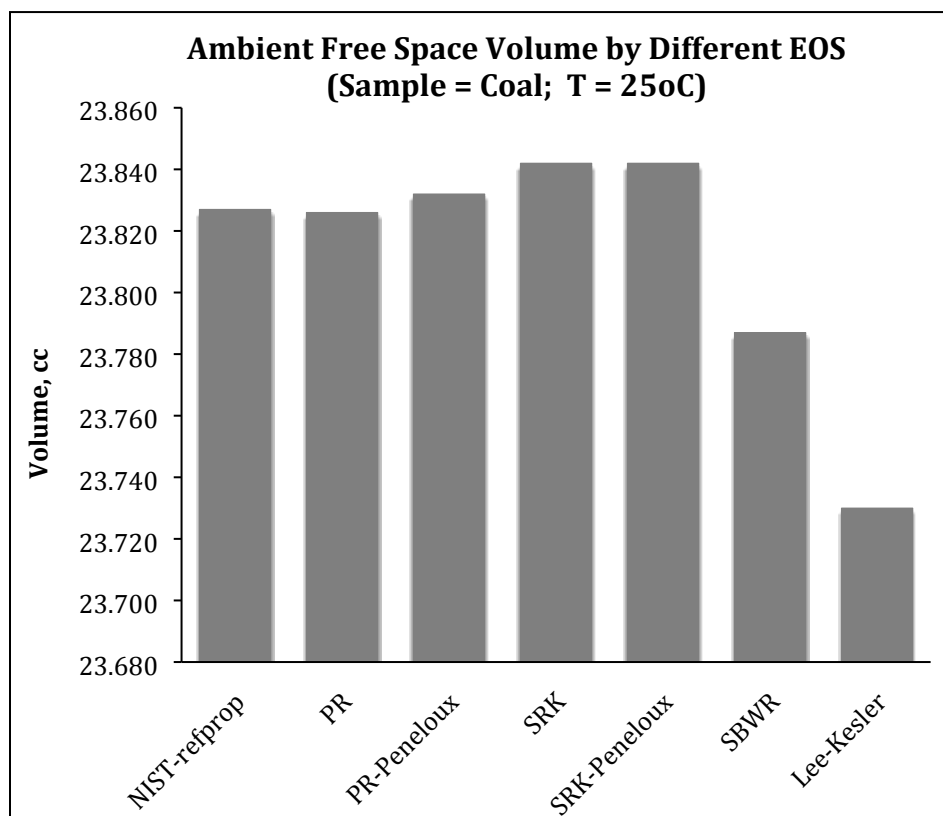

*Figure C1: Effect of Equation of State on ambient volume of free space*

## References

1. Pedersen, K.S. and P.L. Christensen, *Chapter 4: Cubic Equations of State in Phase Behavior of Petroleum Reservoir Fluids*. 2007, Boca Raton: CRC Press, Taylor & Francis Group. 399.
2. Lee, B.I. and M.G. Kesler, *A Generalized Thermodynamic Correlation Based on Three-Parameter Corresponding States*. AIChE Journal, 1975. **21**(3): p. 510 - 527.
3. Jia, W., Z. Li, K. Liao, and C. Li, *Using Lee-Kesler equation of state to compute the compressibility factor of CO<sub>2</sub>-content natural gas*. Journal of Natural Gas Science and Engineering, 2016. **34**(2016): p. 650-656.
4. Soave, G.S., *An effective modification of the Benedict-Webb-Rubin equation of state*. Fluid Phase Equilibria, 1999. **164**(1999): p. 157-172.
5. Zou, J., R. Rezaee, and K. Liu, *Effect of Temperature on Methane Adsorption in Shale Gas Reservoirs*. Energy & Fuels, 2017. **31**(2017): p. 12081 - 12092.
6. Zhang, Y., W. Xing, S. Liu, Y. Liu, M. Yang, J. Zhao, and Y. Song, *Pure methane, carbon dioxide, and nitrogen adsorption on anthracite from China over a wide range of pressures and temperatures: experiments and modeling*. RSC Advances, 2015. **5**(65): p. 52612-52623.
